# Supplementary material for: Restoring mitochondrial cardiolipin homeostasis reduces cell death and promotes recovery after spinal cord injury
Source: PubMed Central journal article supplement (PMC9768173; doi:10.1038/s41419-022-05369-5), 2022-12-20

All Western blots for Fig. 1A-C. \*: representative image on the figure.

A. Cytochrome c

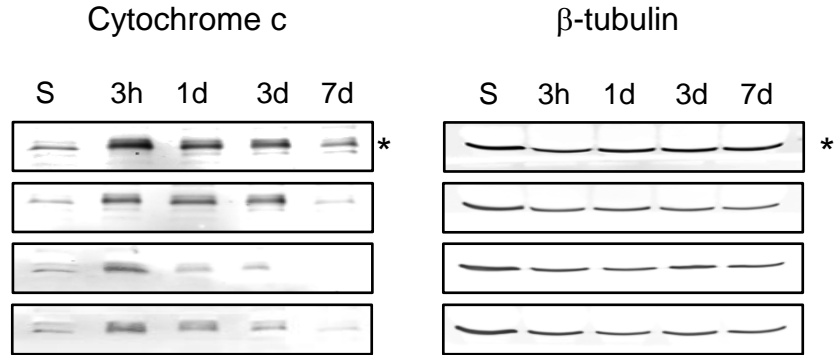

B. Smac/DIALC

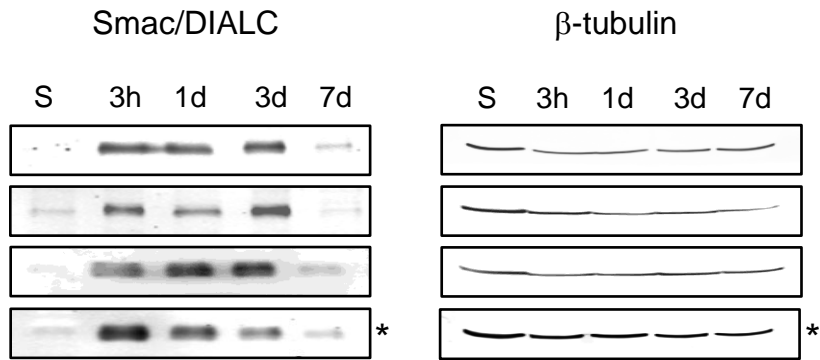

B. Active caspase-3

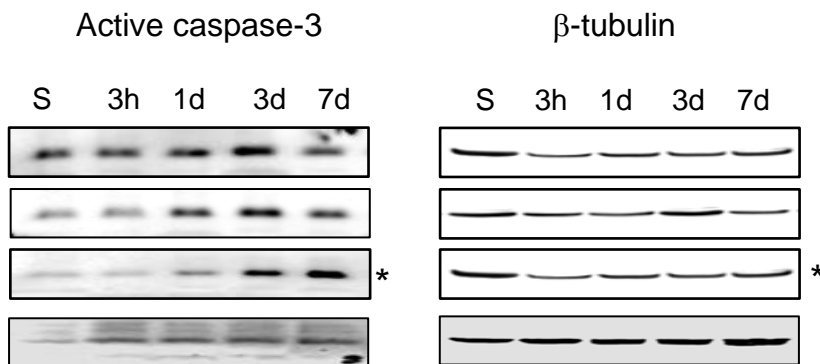

All Western blots for Fig. 4A. \*: representative image on the figure.

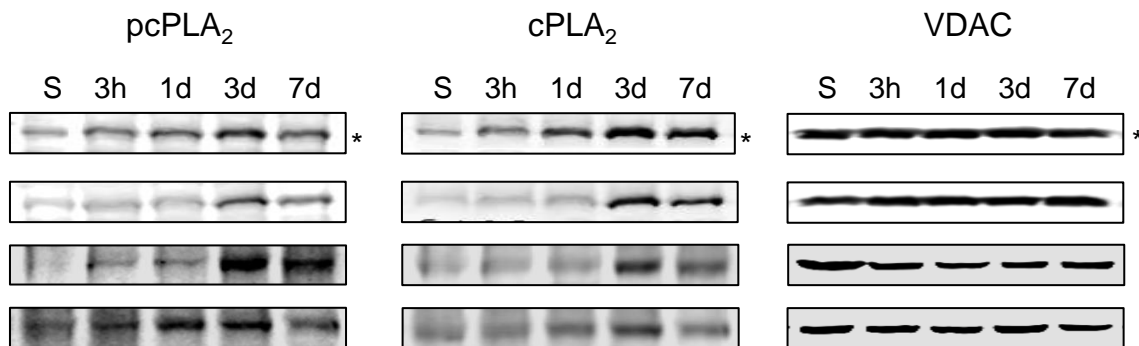

All Western blots for Fig. 4E-H. \*: representative image on the figure.

Fig 4E. Cytochrome c

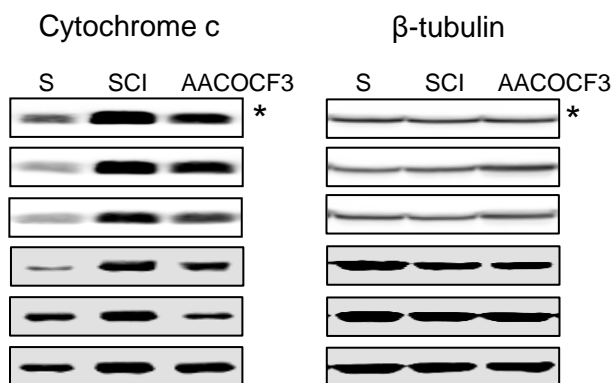

Fig 4F. Smac/DIABLO

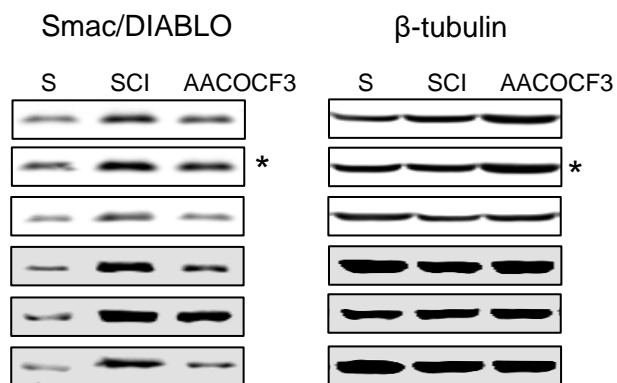

Fig 4G. Caspase-3

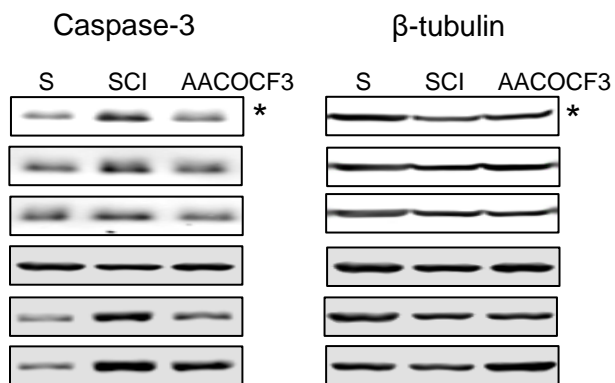

Fig 4H. PARP

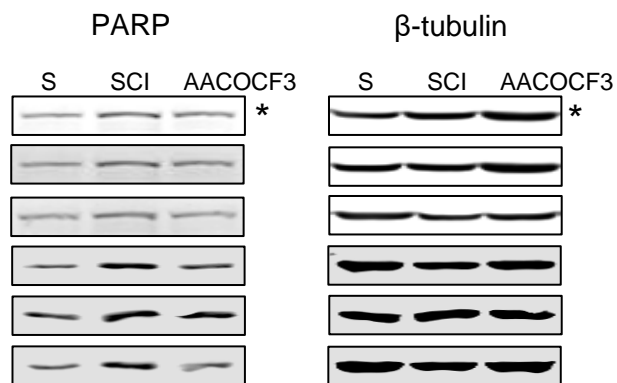

All Western blots for Fig. 4J. \*: representative image on the figure.

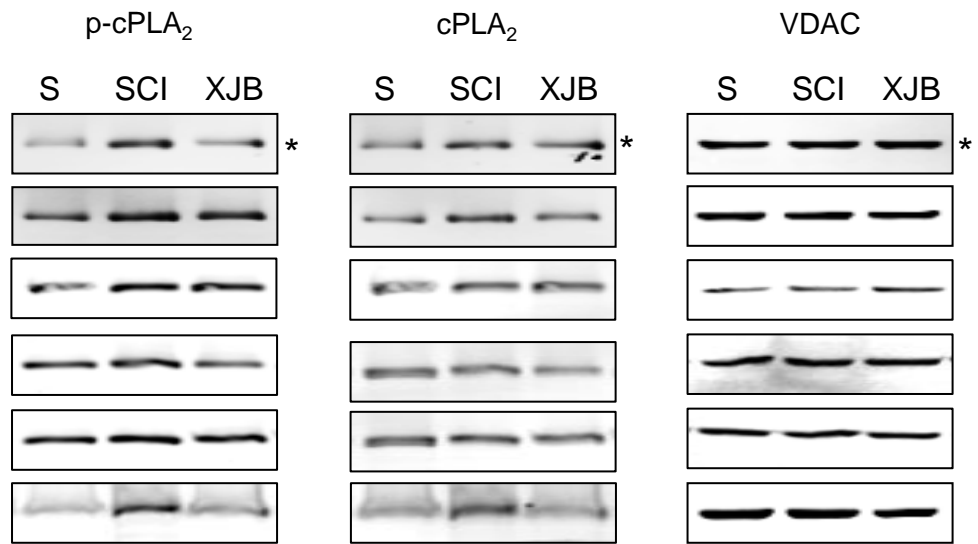

All Western blots for Fig. 5N and O. \*: representative image on the figure.

N. Cytochrome c

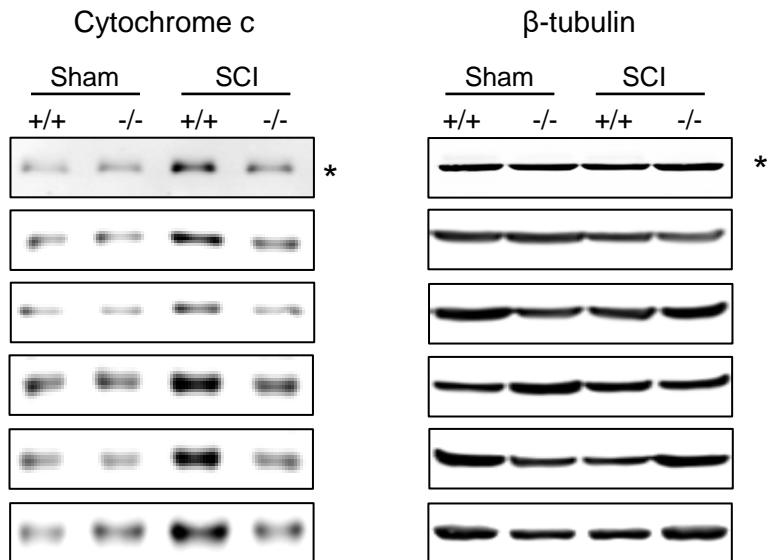

O. Active caspase-3

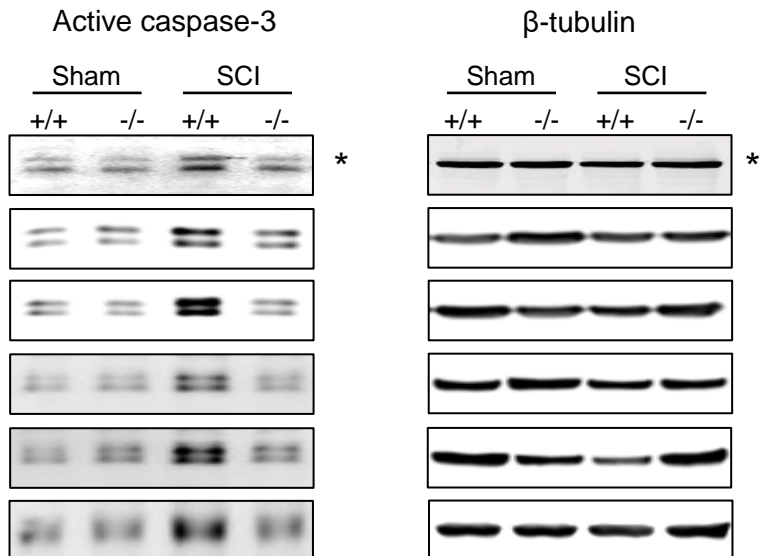

All Western blots for Fig. 6F-H. \*: representative image on the figure.

Fig. 6F Cytochrome c

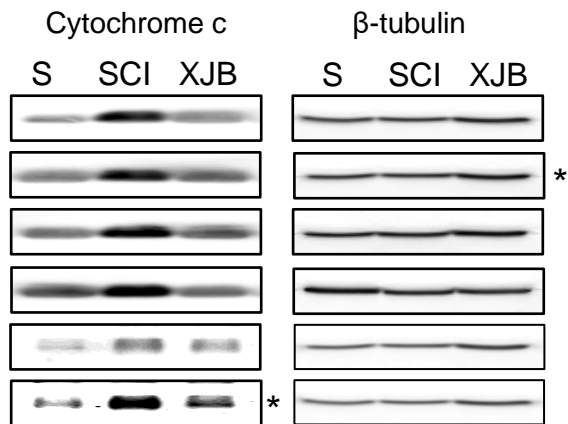

Fig. 6H Active caspase-3

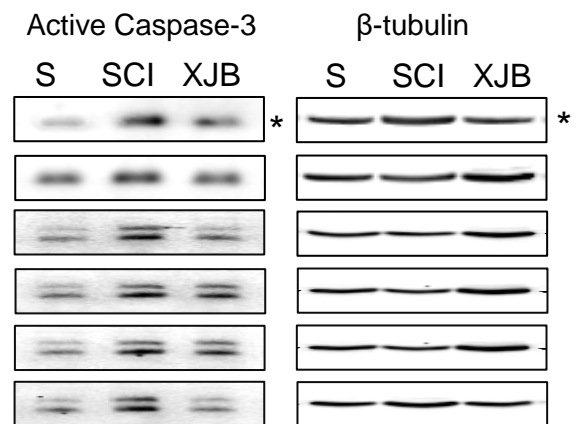

Fig. 6G Samc/DIABLO

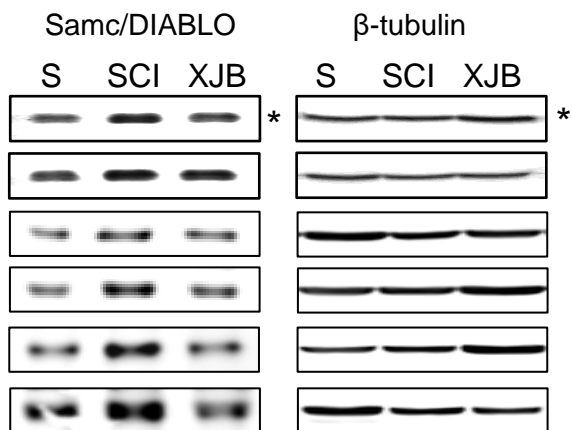

Supplement: 41419_2022_5369_MOESM2_ESM.pdf [file 41419_2022_5369_MOESM2_ESM.pdf]
