# Supplementary material for: Restoring mitochondrial cardiolipin homeostasis reduces cell death and promotes recovery after spinal cord injury
Source: PubMed Central journal article supplement (PMC9768173; doi:10.1038/s41419-022-05369-5), 2022-12-20
Supplement: 41419_2022_5369_MOESM1_ESM.pdf [file 41419_2022_5369_MOESM1_ESM.pdf]

### A. Caspase-3

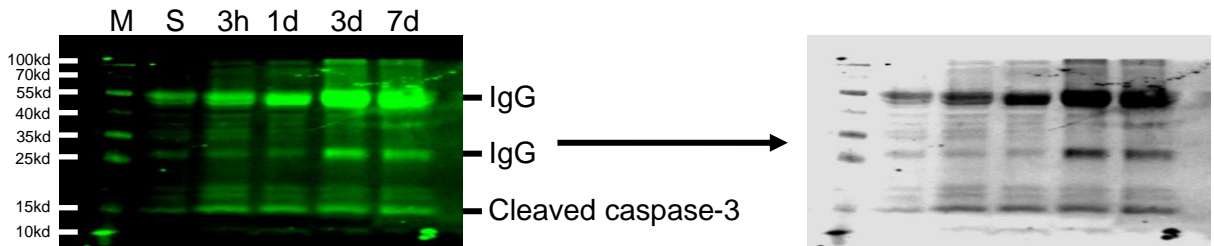

### B. $\beta$ -tubulin

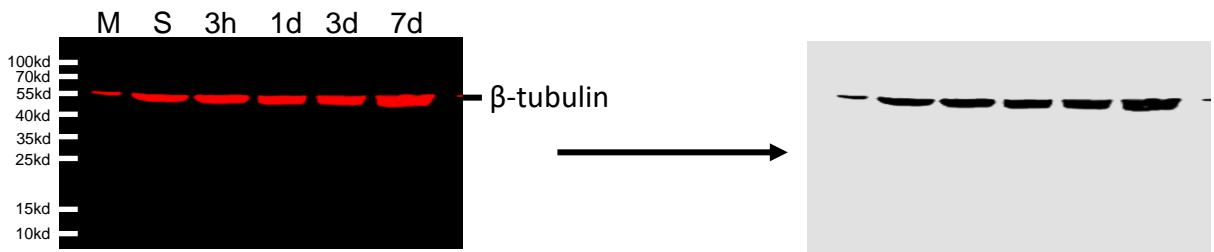

### C. Merge

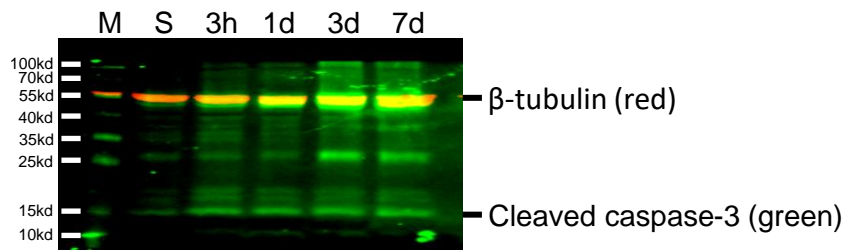

**Supplementary Fig. 1.** Western blot analysis of active caspase-3 expression following SCI using rabbit anti-cleaved Caspase-3 (Asp175) (5A1E) mAb (Green, Cat#: 9664, Cell Signaling Technology) and mouse anti-  $\beta$ -tubulin antibody as a control (red, Cat#: T5293, sigma). The representative images of active caspase-3 (A),  $\beta$ -tubulin (B) and their merge (C). M, Marker; S, sham.

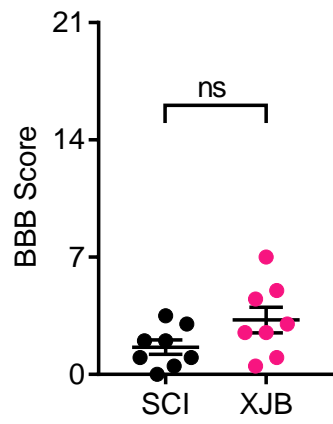

**Supplementary Fig. 2.** The BBB score at 3 days after SCI. ns, not significant.

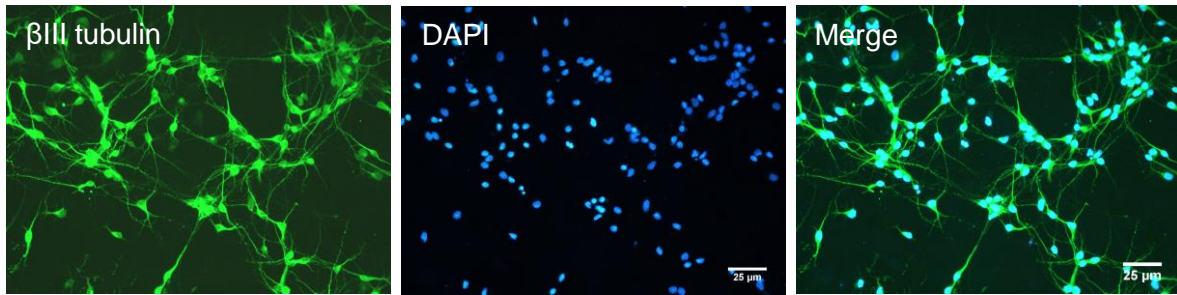

**Supplementary Fig. 3.** Highly purified spinal cord neurons stained with a neurite marker  $\beta$ III tubulin (Green) and counterstained with a fluorescent nuclear marker DAPI (Blue). Bar = 25  $\mu$ m.

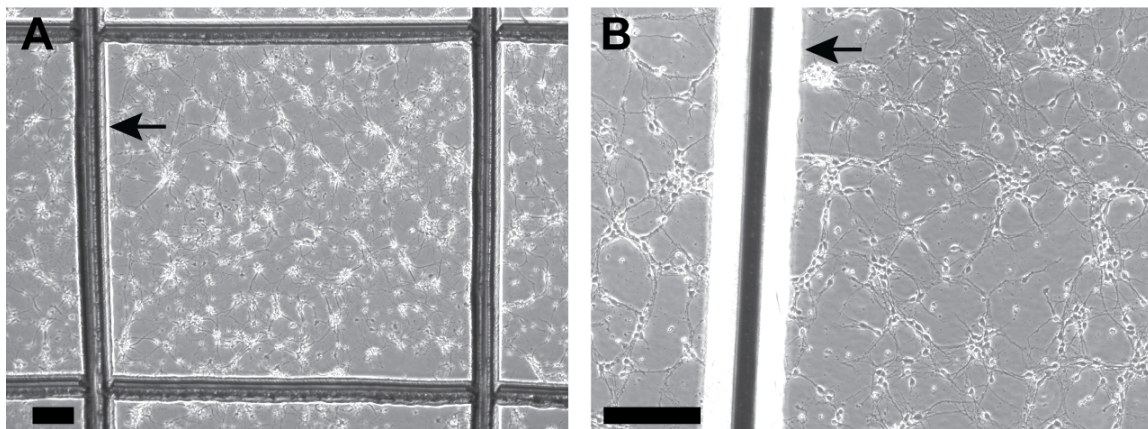

**Supplementary Fig. 4.** Representative images of scratch Injury of spinal cord neuronal culture. A, Low magnification; B, High magnification; Arrow, Scratch injury line. Bar = 200  $\mu$ m.

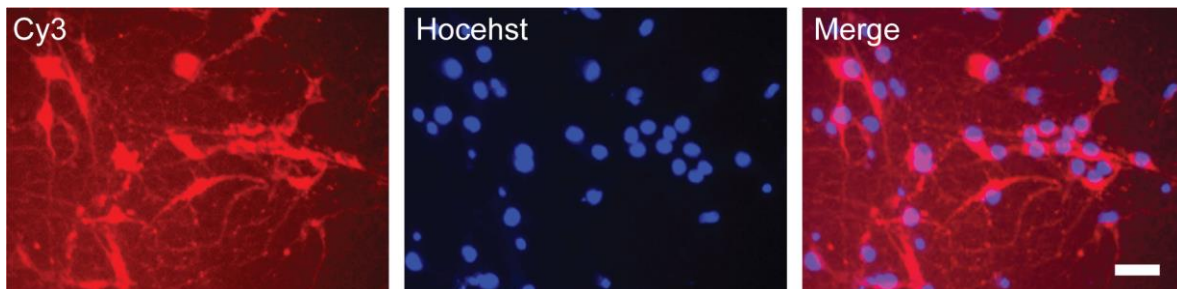

**Supplementary Fig. 5.** Cultured spinal cord neurons were transfected with 50 nM Cy<sup>TM</sup>3 dye-labeled Pre-miR<sup>TM</sup> Negative Control #1 (Ca# 17120, Invitrogen) using Lipofectamine<sup>®</sup> LTX and Plus<sup>™</sup> Reagent according the manufacturer's instructions (Invitrogen). The transfection efficiency was 75%. Red, Cy3 labeled neurons; Blue, nuclei. Bar = 20  $\mu$ m.
